# Supplementary material for: Characterizing water solubility of fresh and aged secondary organic aerosol in PM 2.5 with the stable carbon isotope technique
Source: Copernicus journal article supplement (doi:10.5194/acp-24-8507-2024), 2024-07-30
Supplement: Supplementary file 1 [file acp-24-8507-2024-supplement.pdf]

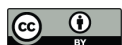

*Supplement of*

## **Characterizing water solubility of fresh and aged secondary organic aerosol in PM<sub>2.5</sub> with the stable carbon isotope technique**

**Fenghua Wei et al.**

*Correspondence to:* Xing Peng (pengxing@pku.edu.cn)

The copyright of individual parts of the supplement might differ from the article licence.

1 **Contents of this file**

2 **Section S1 - Section S2**

3 S1. PMF model and results

4 S2. Sampling of potential emission sources of carbonaceous aerosol

5 **Figure S1 - Figure S5**

6 Figure S1. Seasonal backward trajectory of air masses in Shenzhen, 2019. (a) spring (b) summer (c) fall  
7 (d) winter. Map image: © Microsoft by MeteoInfoMap.

8 Figure S2. The source profiles resolved by PMF for PM<sub>2.5</sub>.

9 Figure S3. Comparison between the measured total mass of species and the PMF reconstructed total mass  
10 of sources of (a) PM<sub>2.5</sub>, (b) WSOC.

11 Figure S4. The relative contribution of different sources to PM<sub>2.5</sub> (a) and carbonaceous aerosol (b) based  
12 on the PMF model. (c) The contribution of different sources to PM<sub>2.5</sub> and carbonaceous aerosol.

13 Figure S5. The source profiles resolved by PMF for WSOC.

14 **Table S1 - Table S3**

15 Table S1. Description of the sampling sites in Shenzhen.

16 Table S2. General meteorological conditions during the sampling period in 2019.

17 Table S3. Comparison of  $\delta^{13}\text{C}_{\text{TC}}$  source signatures in this study with global datasets

## 18 **S1: PMF model and results**

19 In this study, the PMF model (EPA PMF v5.0) was employed to identify the sources of TC and WSOM.  
20 The detailed fundamental principle of this model can be found in Paatero and Tapper. (1994). The mass  
21 concentration and uncertainty matrixes of seventeen indicative chemical components (OM, EC,  $\text{NH}_4^+$ ,  
22  $\text{Cl}^-$ ,  $\text{NO}_3^-$ ,  $\text{SO}_4^{2-}$ , Na, Mg, Al, K, Ca, V, Ni, Cd, Fe, Zn, and Pb) were put into this model to identify the  
23  $\text{PM}_{2.5}$  sources. The measuring methods for each component are described in the main text, and the  
24 measurement processes were subjected to strict quality control as follows, which are also available in  
25 our previous studies (Huang et al., 2019; Yan et al., 2022). The OC/EC analyzer was calibrated using  
26 eight standard concentration gradients of sucrose solution prior to each sample analysis of the  
27 carbonaceous fractions, with all standard curves achieving an  $R^2$  value exceeding 0.999. The charge  
28 concentration balance of water-soluble ions ( $R^2 = 0.98$ , slope = 0.87) confirmed the validity of the  
29 measurement results for water-soluble ions. The spiked recoveries for all metal elements ranged between  
30 80 % and 120 % in this study. Furthermore, the background concentration of blank samples and the  
31 reproducibility of the measurement results were evaluated during the determination of each component,  
32 and all the results met the experimental requirements.

33 To find out the optimal solution, factor numbers ranging from 5 to 11 were evaluated using the PMF  
34 model. Among them, the nine-factor solution exhibited a notable covariance between vehicle emissions  
35 and biomass burning sources, while the eleven-factor solution displayed a dispersed distribution of Pb,  
36 Fe and Cd. Subsequently, the ten-factor solution was identified as optimal due to its highly interpretable  
37 factor profiles (Fig. S2), with scaled residuals demonstrating a generally symmetrically distribution  
38 between  $-3$  and  $+3$ . There was a strong correlation between the total mass of the input species and the

39 total mass of all the model-reconstructed factors ( $R^2 = 0.99$ , slope = 1.04) (Fig. S3), and favorable  
40 correlations were also observed between the source contributions and their corresponding source markers  
41 ( $R^2 = 0.83 \sim 0.96$ ), suggesting robust performance of PMF model. According to Fig. S2, factor 1 exhibited  
42 high percentage explained variation (EV) values for  $\text{SO}_4^{2-}$  (66 %) and  $\text{NH}_4^+$  (59 %). In factor 2, not only  
43 OM and EC displayed substantial EV values (49 % and 62 %), Zn and Fe also contribute notably. Factor  
44 3 demonstrated the highest EV values for the elements Na and Mg. Cl<sup>-</sup> in factor 4 had an EV value of up  
45 to 82 %.  $\text{NO}_3^-$  (67 %) and  $\text{NH}_4^+$  (25 %) exhibited the highest EV values in factor 5. Factor 6 showed the  
46 highest EV values for Pb, Cd and Zn, while factor 7 demonstrated the highest EV values for V and Ni.  
47 Factors 8 ~ 10 exhibited the highest EV values for Ca (73 %), K (72 %) and Al (76 %), respectively.  
48 Consequently, the ten factors were identified as secondary sulfate, vehicle emissions, aged sea salt, coal  
49 combustion, secondary nitrate, industrial emissions, ship emissions, construction dust, biomass burning,  
50 and fugitive dust, respectively. SOA was then estimated from the OM fraction in both secondary sulfate  
51 and secondary nitrate factors. To compare with BSIM results, the source apportionment of TC was  
52 merged into three sources, including SOA, traffic emission, and biomass burning (Fig. S4) (Zong et al.,  
53 2018). The industrial emission source and coal combustion source were not included because of their  
54 little contribution to carbonaceous fraction. The remaining eight sources were then reapportioned and  
55 then combined according to the contribution to OC and EC. Specifically, the contributions of vehicle and  
56 ship emissions to EC and OC were attributed to the traffic source. The contributions of secondary sulfate,  
57 secondary nitrate, and aged sea salt sources to OC were all attributed to the SOA. The contributions of  
58 biomass burning source to OC were attributed to the BB (biomass burning) source.

59 In the source apportionment of WSOC, the mass concentration and uncertainty matrixes of five  
60 species ( $\text{CO}_2^+$ ,  $\text{C}_4\text{H}_9^+$ ,  $\text{C}_2\text{H}_4\text{O}_2^+$ , WSOC, and WSOO) were put into the PMF model to identify and

61 calculate source contributions to WSOC. Following examination of a range of 2 to 4 factor numbers, a  
62 three-factor solution output by the PMF model was determined to be optimal. The scaled residuals  
63 exhibited a generally symmetrical distribution between -3 and +3 as well. Moreover, there was also a  
64 strong overall correlation between the total factor concentrations reconstructed by the PMF model and  
65 the total mass concentrations of the measured species ( $R^2 = 0.99$ , slope = 0.97) (Fig. S3). According to  
66 Fig. S5, factor 1 displayed the highest percentage of EV values for  $m/z$  44 ( $\text{CO}_2^+$ ) and WSOO (73 % and  
67 63 %, respectively), with an oxygen-carbon ratio (O/C) of 1.01, which is highly oxidized and identified  
68 as aged SOC source. Factor 2 exhibited EV values of 64% for  $m/z$  57 ( $\text{C}_4\text{H}_9^+$ ), 29% for WSOC, 27% for  
69  $m/z$  44, and 23% for WSOO. In addition, factor 2 had a lower level of oxidation with an O/C ratio of  
70 0.43, and was therefore identified as fresh SOC source. Factor 3 demonstrated a 100 % EV value for  $m/z$   
71 60 ( $\text{C}_2\text{H}_4\text{O}_2^+$ ) and a low O/C ratio of 0.36, indicating that factor 3 represented the biomass burning source  
72 (BB).

## 73 **S2: Sampling of potential emission sources of carbonaceous aerosol**

74  $\text{PM}_{2.5}$  samples of four sources were collected from ambient air and simulation experiments to measure  
75 the  $\delta^{13}\text{C}$  values of TC and WSOC in this study. We collected  $\text{PM}_{2.5}$  samples from two tunnel sites (Mount  
76 Tanglang tunnel and Jiuweiling tunnel), which can comprehensively reflect the vehicle emissions level  
77 to ambient air in Shenzhen because of its specificity of the environment. Two medium-flow samplers  
78 (KC-120H model, Qingdao Laoshan, 100 L/min) were used in this sampling process. The lengths of  
79 those two tunnels were 1711 m and 1447 m, representing the emission characteristics of diesel and petrol  
80 vehicles in Shenzhen respectively. Specifically, six samples were obtained from 23:00 to 02:10 and 02:30  
81 to 05:30 on 13-18 October 2014 at the Mount Tanglang tunnel site. Additional eight samples were  
82 subsequently collected at different periods (peak and off-peak traffic periods in both daytime and night)

83 on 20-22 January 2015 at the junction of one side of Mount Tanglang tunnel, and the sampling durations  
84 ranged from 2.5 to 11.5 hours. A total of 11 samples were obtained at the Jiuweiling tunnel site. The peak  
85 and off-peak traffic periods in both daytime and night were also included in this sampling period, and  
86 the sampling durations ranged from 2 to 6 hours. For fresh SOA, five PM<sub>2.5</sub> samples from petrol vehicle  
87 bench tests conducted under different fuel types and operating conditions were collected. Detailed  
88 information about this test system was displayed in Zheng et al. (2017) (Zheng 2017). Two parallel  
89 samples were collected and measured under each operating condition to ensure the reliability of the  
90 measured data. Two aged SOA samples were collected at the national ambient air background monitoring  
91 station in Mount Wuzhi, Hainan Province, from 13-15 April 2015. A complete secondary transport  
92 process was captured during this sampling period, and each sampling duration was 23.5 hours. Lastly,  
93 We collected three PM<sub>2.5</sub> samples representing the biomass combustion source through biomass  
94 combustion simulation experiment (He et al., 2010), of which were conducted in the combustion  
95 simulation laboratory at Peking University Shenzhen Graduate School on 24-28 May 2017. Pine  
96 branches, as a major source of biomass burning in south China (Chen et al., 2017) were selected as the  
97 representative plant for the combustion simulation experiment in this study. The pine branches were  
98 divided into three weight groups (low (3 kg), medium (6 kg) and high (8 kg)). Samples at three different  
99 combustion stages (ignition, flame combustion, and complete combustion) were collected, and the  
100 sampling time at each stage was 49, 75, and 90 minutes, respectively. Each sampling and analysis process  
101 was repeated three times to ensure reliability.

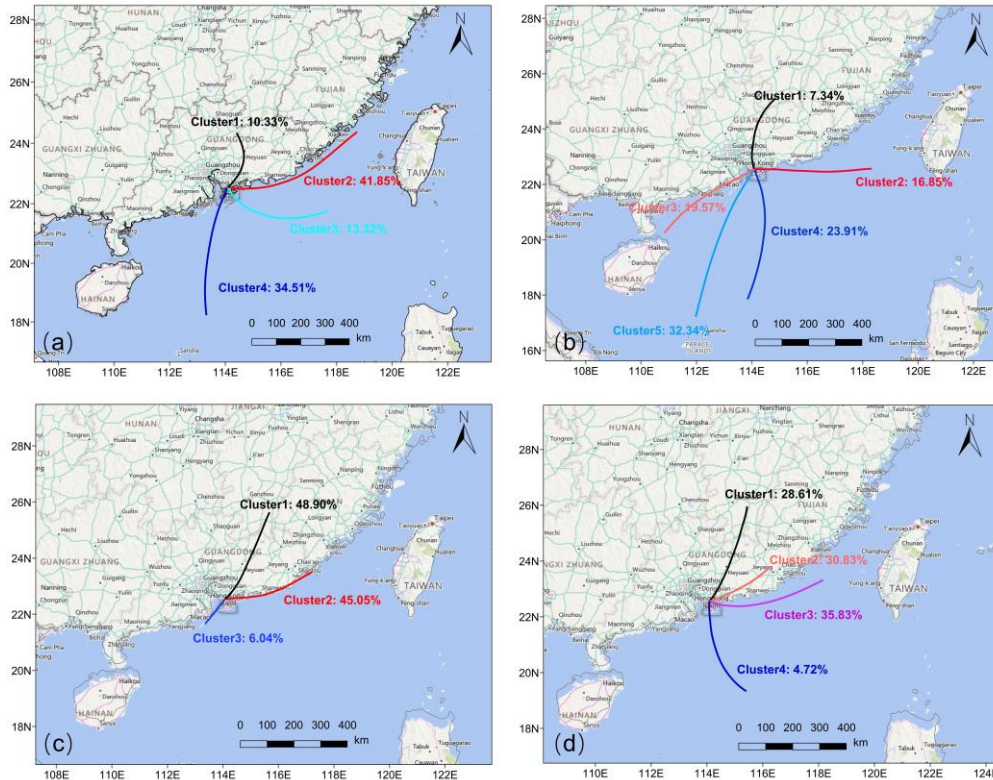

102

103 **Figure S1.** Seasonal backward trajectory of air masses in Shenzhen, 2019. (a) spring (b) summer (c) fall

104 (d) winter. Map image: © Microsoft by MeteInfoMap.

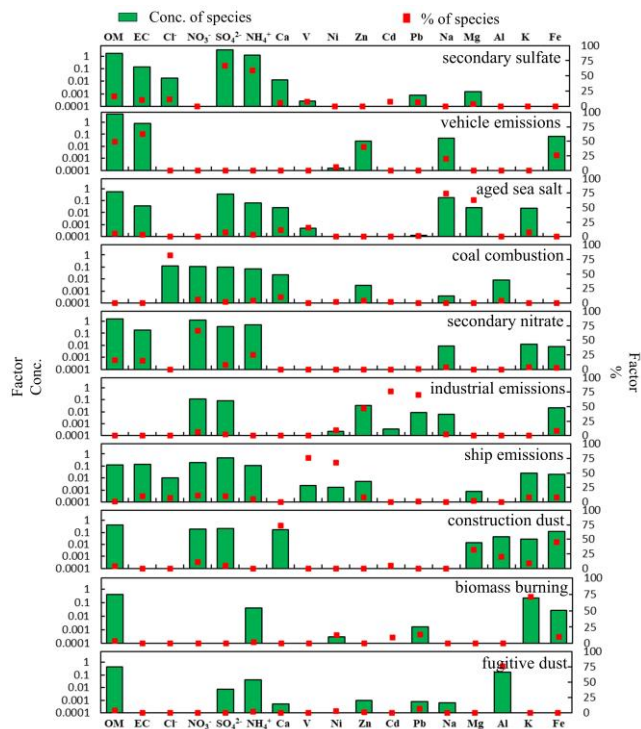

105

106

**Figure S2.** The source profiles resolved by PMF for PM<sub>2.5</sub>.

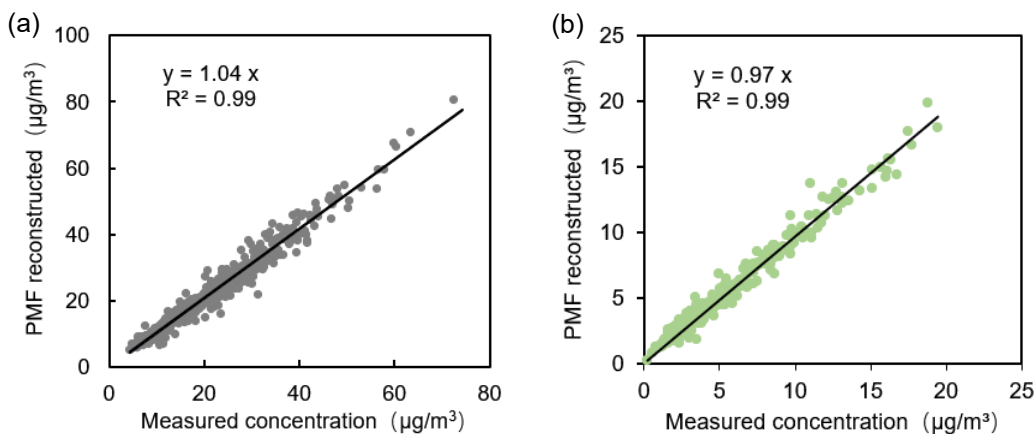

107

108 **Figure S3.** Comparison between the measured total mass of species and the PMF reconstructed total  
 109 mass of sources of (a)  $\text{PM}_{2.5}$ , (b) WSOC.

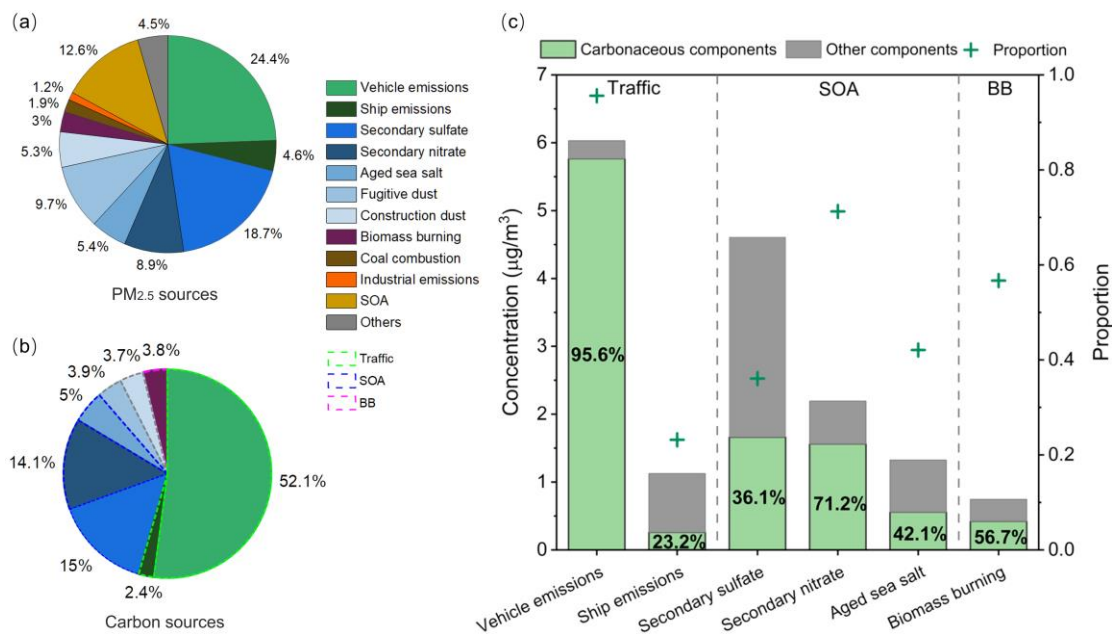

110

111 **Figure S4.** The relative contribution of different sources to  $\text{PM}_{2.5}$  (a) and carbonaceous aerosol (b) based  
 112 on the PMF model. (c) The contribution of different sources to  $\text{PM}_{2.5}$  and carbonaceous aerosol.



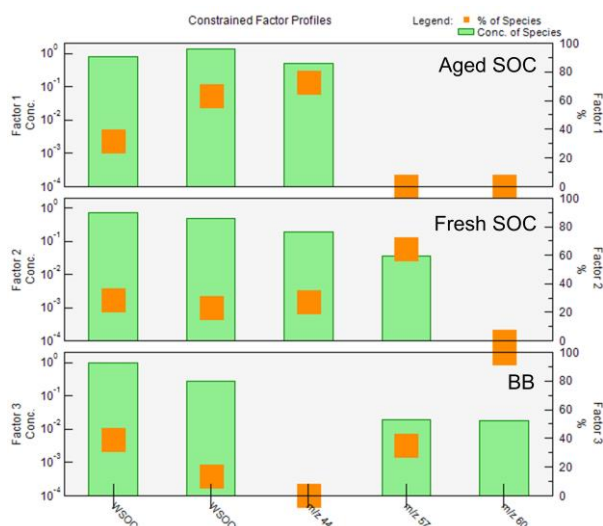

113

114

**Figure S5.** The source profiles resolved by PMF for WSOC.

115

**Table S1.** Description of the sampling sites in Shenzhen.

| Site            | Site Code | Coordinates                    | Site description                                                                                        |
|-----------------|-----------|--------------------------------|---------------------------------------------------------------------------------------------------------|
| University town | UT        | Lat: 22.59°N<br>Long: 113.97°E | Urban<br>This site reflects the pollution characteristics of typical urban areas and regional transport |
| Longhua         | LH        | Lat: 22.68°N<br>Long: 114.01°E | Urban<br>This site generally reflects the pollution characteristics of urban local emissions            |
| Honghu          | HH        | Lat: 22.57°N<br>Long: 114.14°E | Urban<br>This site reflects the pollution characteristics of the general urban areas                    |
| Xixiang         | XX        | Lat: 22.58°N<br>Long: 113.90°E | Urban<br>This site reflects the pollution characteristics of western industrial urban areas in Shenzhen |
| Dapeng          | DP        | Lat: 22.64°N<br>Long: 114.42°E | Background<br>This site reflects the pollution characteristics of the eastern coastal tourist areas     |

116

**Table S2.** General meteorological conditions during the sampling period in 2019.

|                        | Mean temp. (°C) | Rainfall (mm) | Mean RH (%) | Mean wind speed (m s <sup>-1</sup> ) | Predominant wind direction |
|------------------------|-----------------|---------------|-------------|--------------------------------------|----------------------------|
| Spring (1 Mar-8 Apr)   | 21.3            | 151.8         | 83.0        | 1.7                                  | ESE                        |
| Summer (1 Jun-3 Jul)   | 28.5            | 275.8         | 85.0        | 2.2                                  | SW                         |
| Autumn (1 Sept-11 Oct) | 27.6            | 175.0         | 74.0        | 1.6                                  | ESE                        |
| Winter (22 Nov-30 Dec) | 19.5            | 3.2           | 62.0        | 2.0                                  | NNE                        |

117

118 **Table S3.** Comparison of  $\delta^{13}\text{C}_{\text{TC}}$  source signatures in this study with global datasets.

| <b>Emission sources</b> | <b>Continent</b>        | <b>Location</b>        | <b>Sample types</b>                | <b><math>\delta^{13}\text{C}(\text{‰})</math></b> | <b>SD</b>   | <b>Ref.</b>                      |
|-------------------------|-------------------------|------------------------|------------------------------------|---------------------------------------------------|-------------|----------------------------------|
|                         | <b>Asia(This study)</b> | <b>China, Shenzhen</b> | <b>Traffic</b>                     | <b>-26.26</b>                                     | <b>0.50</b> | <b>-</b>                         |
|                         | Asia                    | China                  | Wucun Tunnel, Entrance             | -25.84                                            | 0.23        |                                  |
|                         | Asia                    | China                  | Wucun Tunnel, Exit                 | -25.88                                            | 0.24        | (Yao et al., 2022)               |
|                         | Asia                    | China                  | Xianyueshan Tunnel, Entrance       | -25.88                                            | 0.26        |                                  |
|                         | Asia                    | China                  | Xianyueshan Tunnel, Exit           | -25.79                                            | 0.23        |                                  |
|                         | Asia                    | Guangzhou              | Traffic                            | -24.6 to -25.5                                    |             | (Dai et al., 2015)               |
|                         | Asia                    | India                  | Traffic                            | -25.3                                             | 0.3         | (Agnihotri et al., 2011)         |
|                         | Asia                    | Nepal                  | Traffic                            | -26.5 to -26.1                                    |             | (Shakya;Ziemba and Griffin 2010) |
|                         | Asia                    | China                  | Traffic                            | -25.85                                            | 0.22        | (Yao et al., 2022)               |
|                         | Asia                    | China                  | Traffic                            | -25.27                                            | 0.32        | (Chen et al., 2012)              |
| <b>Traffic</b>          | Asia                    | Pearl River Delta      | Gasoline exhaust                   | -28.6                                             | 0.6         |                                  |
|                         | Asia                    | Pearl River Delta      | Diesel exhaust                     | -27.8                                             | 0.2         |                                  |
|                         | Asia                    | China                  | Zhujiang Tunnel, Vehicle emissions | -25                                               | 0.3         | (Dai et al.,2013)                |
|                         | Asia                    | India                  | Diesel exhaust                     | -26.3                                             | 0.2         |                                  |
|                         | Asia                    | India                  | Bio-diesel exhaust                 | -26.5                                             | 0.1         | (Singh et al., 2018)             |
|                         | Asia                    | India                  | Petrol(Gasoline) exhaust           | -26.1                                             | 0.01        |                                  |
|                         | North America           | Mexico                 | Tunnel; Diesel vehicle emissions   | -24.6                                             | 0.3         |                                  |
|                         | North America           | Mexico                 | Tunnel; Gasoline vehicle emissions | -25.5                                             | 0.1         | (López-Veneroni 2009)            |
|                         | Oceania                 | New Zealand            | Mount Victoria Tunnel              | -25.9                                             | 0.8         | (Ancelet et al., 2011)           |
|                         | Europe                  | Germany                | Gasoline exhaust                   | -26.2                                             | 0.2         | (Fisseha et al., 2009)           |
|                         | Europe                  | Paris                  | Diesel exhaust                     | -26.5                                             | 0.5         | (Widory et al., 2004)            |
|                         | Europe                  | Germany                | Diesel exhaust                     | -27.6                                             | 0.01        | (Fisseha et al., 2009)           |
|                         | Europe                  | Paris                  | Complete combustion of diesel      | -29                                               |             | (Widory 2006)                    |

|            |                        |                        |                                                      |                |             |                        |
|------------|------------------------|------------------------|------------------------------------------------------|----------------|-------------|------------------------|
|            | Europe                 | Paris                  | Complete combustion of gasoline                      | -27            |             | (Widory 2006)          |
|            | Europe                 | Paris                  | Fuel oil exhaust                                     | -26.5          | 0.5         | (Widory et al., 2004)  |
|            | Europe                 | Krakow, Poland         | Traffic                                              | -30            | 1           | (Zimnoch et al., 2020) |
|            | worldwide              | worldwide              | Traffic group1                                       | -26.8          | 1.1         |                        |
|            | worldwide              | worldwide              | Traffic group2                                       | -28.9          | 1.7         | (Yao et al., 2022)     |
|            | worldwide              | worldwide              | Traffic group3                                       | 30.2           | 0.9         |                        |
|            | <b>Asia(Our study)</b> | <b>China, Hainan</b>   | <b>Aged SOC , ambient samples of the Mount Wuzhi</b> | <b>-25.54</b>  | <b>0.28</b> | -                      |
|            | <b>Asia(Our study)</b> | <b>China, Shenzhen</b> | <b>Fresh SOC , petrol vehicle bench tests</b>        | <b>-27.31</b>  | <b>0.73</b> |                        |
| <b>SOA</b> | Europe                 | Germany                | Compounds in SOA: aerosol-phase nopinone             | -27.6 to -24.8 |             |                        |
|            | Europe                 | Germany                | Compounds in SOA: acetone                            | -35.1 to -38.6 |             |                        |
|            | Europe                 | Germany                | Compounds in SOA: gas-phase nopinone                 | -28.8          |             | (Fisseha et al., 2009) |
|            | Europe                 | Germany                | Precursor of SOA: initial $\beta$ -pinene injected   | -30.1          |             |                        |
|            | Europe                 | Germany                | Precursors of SOA                                    | -29.6          | 0.2         |                        |
|            | North America          | Canada                 | Secondary particulate organic matter                 |                |             | (Irei et al., 2011)    |
|            | North America          | Canada,                | Secondary particulate organic matter                 | -32.2 to -32.9 |             | (Irei et al., 2006)    |
|            | <b>Asia(Our study)</b> | <b>China, Shenzhen</b> | <b>Burning experiment results of pine branches</b>   | <b>-27.58</b>  | <b>0.24</b> | -                      |
|            | worldwide              | worldwide              | C3 plant                                             | -27.2          | 1.6         |                        |
|            | Asia                   | China                  | C3 plant                                             | -27.89         | 0.26        | (Yao et al., 2022)     |
|            | Asia                   | China                  | Seven C3 plants                                      | -27.12         |             |                        |
|            | Asia                   | China                  | Biomass burning (Seven C3 plants)                    | -26.99         | 1.11        |                        |
| <b>BB</b>  | America                | Texas                  | C3 plant                                             | -27            | 6           | (Boutton 1991)         |
|            | Europe                 | Krakow, Poland         | Biomass burning(C3 plants)                           | -26            | 2           | (Zimnoch et al., 2020) |
|            | Asia                   | China                  | C4 smoldering                                        | -14.25         |             |                        |
|            | Asia                   | China                  | C4 flaming                                           | -18.42         |             |                        |
|            | Asia                   | China                  | C4 plant (corn stalk)                                | -12            |             | (Yao et al., 2022)     |
|            | Asia                   | China                  | Biomass burning (corn stalk)                         | -13.09         |             |                        |
|            | worldwide              | worldwide              | C4 plant                                             | -13.2          | 1.1         |                        |
|            | America                | Texas                  | C4 plant                                             | -13            | 4           | (Boutton 1991)         |

120 **References**

- 121 Agnihotri, R., Mandal, T. K., Karapurkar, S. G., Naja, M., Gadi, R., Ahammed, Y. N., Kumar, A., Saud,  
122 T. and Saxena, M.: Stable carbon and nitrogen isotopic composition of bulk aerosols over India and  
123 northern Indian Ocean, *Atmos. Environ.*, 45, 2828-2835, 2011.
- 124 Ancelet, T., Davy, P. K., Trompetter, W. J., Markwitz, A. and Weatherburn, D. C.: Carbonaceous aerosols  
125 in an urban tunnel, *Atmos. Environ.*, 45, 4463-4469, 2011.
- 126 Boutton, T. W.: 11-Stable carbon isotope ratios of natural materials: II, atmospheric, terrestrial, marine,  
127 and freshwater environments, *Carbon Isotope Techniques.*, 274, 1991.
- 128 Chen, Y., Wenger, J. C., Yang, F. M., Cao, J. J., Huang, R. J., Shi, G. M., Zhang, S. M., Tian, M. and Wang,  
129 H. B.: Source characterization of urban particles from meat smoking activities in Chongqing, China  
130 using single particle aerosol mass spectrometry, *Environ. Pollut.*, 228, 92-101, 2017.
- 131 Chen, Y. J., Cai, W. W., Huang, G. P., Li, J. and Zhang, G.: Stable carbon isotope of black carbon from  
132 typical emission sources in China, *Environ. Sci.*, 33, 673-678, 2012.
- 133 Dai, S., Bi, X., Chan, L. Y., He, J., Wang, B., Wang, X., Peng, P., Sheng, G. and Fu, J.: Chemical and  
134 stable carbon isotopic composition of PM<sub>2.5</sub> from on-road vehicle emissions in the PRD region and  
135 implications for vehicle emission control policy, *Atmos. Chem. Phys.*, 15, 3097-3108, 2015.
- 136 Fisseha, R., Spahn, H., Wegener, R., Hohaus, T., Brasse, G., Wissel, H., Tillmann, R., Wahner, A.,  
137 Koppmann, R. and Kiendler-Scharr, A.: Stable carbon isotope composition of secondary organic  
138 aerosol from  $\beta$ -pinene oxidation, *J. Geophys. Res. Atmos.*, 114, D02304,  
139 <https://doi.org/10.1029/2008JD011326>, 2009.
- 140 He, L. Y., Lin, Y., Huang, X. F., Guo, S., Xue, L., Su, Q., Hu, M., Luan, S. J. and Zhang, Y. H.:  
141 Characterization of high-resolution aerosol mass spectra of primary organic aerosol emissions from  
142 Chinese cooking and biomass burning, *Atmos. Chem. Phys.*, 10, 11535-11543, 2010.
- 143 Huang, X. F., Zou, B. B., He, L. Y., Hu, M. and Prevot, A. S. H.: Exploration of PM<sub>2.5</sub> sources on the  
144 regional scale in the Pearl River Delta based on ME-2 modeling, *Atmos. Chem. Phys.*, 18 (16),  
145 11563-11580, 2018.
- 146 Irei, S., Huang, L., Collin, F., Zhang, W., Hastie, D. and Rudolph, J.: Flow reactor studies of the stable  
147 carbon isotope composition of secondary particulate organic matter generated by OH-radical-  
148 induced reactions of toluene, *Atmos. Environ.*, 40, 5858-5867, 2006.

149 Irei, S., Rudolph, J., Huang, L., Auld, J. and Hastie, D.: Stable carbon isotope ratio of secondary  
150 particulate organic matter formed by photooxidation of toluene in indoor smog chamber, *Atmos.*  
151 *Environ.*, 45, 856-862, 2011.

152 López-Veneroni, D.: The stable carbon isotope composition of PM<sub>2.5</sub> and PM<sub>10</sub> in Mexico City  
153 Metropolitan Area air, *Atmos. Environ.*, 43, 4491-4502, 2009.

154 Paatero, P. and Tapper, U.: Positive matrix factorization: a nonnegative factor model with optimal  
155 utilization of error estimates of data values, *Environmetrics.*, 5, 111-126, 1994.

156 Shakya, K. M., Ziemba, L. D. and Griffin, R. J.: Characteristics and sources of carbonaceous, ionic, and  
157 isotopic species of wintertime atmospheric aerosols in Kathmandu valley, Nepal, *Aerosol Air Qual*  
158 *Res.*, 10, 219-U13, 2010.

159 Singh, G. K., Rajput, P., Paul, D. and Gupta, T.: Wintertime study on bulk composition and stable carbon  
160 isotope analysis of ambient aerosols from North India, *J. Aerosol Sci.*, 126, 231-241, 2018.

161 Widory, D. *Combustibles, fuels and their combustion products: A view through carbon isotopes*, *Combust.*  
162 *Theory Model.*, 10, 831-841, 2006.

163 Widory, D., Roy, S., Le Moullec, Y., Goupil, G., Cocherie, A. and Guerrot, C.: The origin of atmospheric  
164 particles in Paris: a view through carbon and lead isotopes, *Atmos. Environ.*, 38, 953-961, 2004.

165 Yan, R. H., Peng, X., Lin, W., He, L. Y., Wei, F. H., Tang, M. X. and Huang, X. F.: Trends and Challenges  
166 regarding the source-specific health risk of PM<sub>2.5</sub>-bound metals in a Chinese megacity from 2014 to  
167 2020, *Environ. Sci. Technol.*, 56 (11), 6996-7005, 2022.

168 Yao, P., Huang, R. J., Ni, H. Y., Kairys, N., Yang, L., Meijer, H. A. J. and Dusek, U.: <sup>13</sup>C signatures of  
169 aerosol organic and elemental carbon from major combustion sources in China compared to  
170 worldwide estimates, *Sci. Total Environ.*, 810, 151284,  
171 <https://doi.org/10.1016/j.scitotenv.2021.151284>, 2022.

172 Zheng, J.: *Source apportionment of organic aerosols and contribution of secondary formation from*  
173 *vehicle emissions*, Peking university, 2017.

174 Zimnoch, M., Samek, L., Furman, L., Styszko, K., Skiba, A., Gorczyca, Z., Galkowski, M., Rozanski, K.  
175 and Konduracka, E.: Application of natural carbon isotopes for emission source apportionment of  
176 carbonaceous particulate matter in urban atmosphere: a case study from Krakow, southern Poland,  
177 *Sustainability-Basel.*, 12, 5777, <https://doi.org/10.3390/su12145777>, 2020.

178 Zong, Z., Tan, Y., Wang, X., Tian, C., Fang, Y., Chen, Y., Fang, Y., Han, G., Li, J. and Zhang, G.:

179      *Assessment and quantification of NO<sub>x</sub> sources at a regional background site in North China:*  
180      *Comparative results from a Bayesian isotopic mixing model and a positive matrix factorization*  
181      *model, Environ. Pollut., 242, 1379-1386, 2018.*
